# Supplementary material for: Faster Increases in Human Life Expectancy Could Lead to Slower Population Aging
Source: PubMed Central journal article supplement (PMC4398478; doi:10.1371/journal.pone.0121922), 2015-04-15
Supplement: pone.0121922.s001.pdf [file pone.0121922.s001.pdf]

# Supporting Information

S1 Table. Remaining Life Expectancies at Age 65 (females).

|                   | Scenario 1 | Scenario 2 | Scenario 3 |
|-------------------|------------|------------|------------|
| <b>Albania</b>    |            |            |            |
| 2013              | 19.43      | 19.43      | 19.43      |
| 2030              | 19.43      | 20.45      | 21.56      |
| 2050              | 19.43      | 21.74      | 24.44      |
| <b>Austria</b>    |            |            |            |
| 2013              | 21.37      | 21.37      | 21.37      |
| 2030              | 21.37      | 22.75      | 24.24      |
| 2050              | 21.37      | 24.47      | 28.01      |
| <b>Belarus</b>    |            |            |            |
| 2013              | 17.45      | 17.45      | 17.45      |
| 2030              | 17.45      | 18.23      | 19.07      |
| 2050              | 17.45      | 19.45      | 21.79      |
| <b>Belgium</b>    |            |            |            |
| 2013              | 21.31      | 21.31      | 21.31      |
| 2030              | 21.31      | 22.66      | 24.13      |
| 2050              | 21.31      | 24.12      | 27.35      |
| <b>Bulgaria</b>   |            |            |            |
| 2013              | 17.18      | 17.18      | 17.18      |
| 2030              | 17.18      | 17.95      | 18.78      |
| 2050              | 17.18      | 19.19      | 21.55      |
| <b>Croatia</b>    |            |            |            |
| 2013              | 18.68      | 18.68      | 18.68      |
| 2030              | 18.68      | 19.83      | 21.07      |
| 2050              | 18.68      | 21.25      | 24.21      |
| <b>Cyprus</b>     |            |            |            |
| 2013              | 20.41      | 20.41      | 20.41      |
| 2030              | 20.41      | 21.41      | 22.48      |
| 2050              | 20.41      | 22.97      | 25.86      |
| <b>Czech Rep.</b> |            |            |            |
| 2013              | 19.32      | 19.32      | 19.32      |
| 2030              | 19.32      | 20.67      | 22.12      |
| 2050              | 19.32      | 22.32      | 25.77      |
| <b>Denmark</b>    |            |            |            |
| 2013              | 20.17      | 20.17      | 20.17      |
| 2030              | 20.17      | 21.20      | 22.30      |
| 2050              | 20.17      | 22.63      | 25.38      |

|                | Scenario 1 | Scenario 2 | Scenario 3 |
|----------------|------------|------------|------------|
| <b>Estonia</b> |            |            |            |
| 2013           | 20.00      | 20.00      | 20.00      |
| 2030           | 20.00      | 20.41      | 20.84      |
| 2050           | 20.00      | 21.67      | 23.53      |
| <b>Finland</b> |            |            |            |
| 2013           | 21.61      | 21.61      | 21.61      |
| 2030           | 21.61      | 22.85      | 24.18      |
| 2050           | 21.61      | 24.33      | 27.43      |
| <b>France</b>  |            |            |            |
| 2013           | 23.70      | 23.70      | 23.70      |
| 2030           | 23.70      | 24.82      | 26.01      |
| 2050           | 23.70      | 26.30      | 29.22      |
| <b>Georgia</b> |            |            |            |
| 2013           | 17.63      | 17.63      | 17.63      |
| 2030           | 17.63      | 18.41      | 19.24      |
| 2050           | 17.63      | 19.70      | 22.08      |
| <b>Germany</b> |            |            |            |
| 2013           | 21.14      | 21.14      | 21.14      |
| 2030           | 21.14      | 22.33      | 23.60      |
| 2050           | 21.14      | 23.81      | 26.84      |
| <b>Greece</b>  |            |            |            |
| 2013           | 20.84      | 20.84      | 20.84      |
| 2030           | 20.84      | 22.20      | 23.66      |
| 2050           | 20.84      | 23.73      | 27.06      |
| <b>Hungary</b> |            |            |            |
| 2013           | 18.09      | 18.09      | 18.09      |
| 2030           | 18.09      | 19.03      | 20.05      |
| 2050           | 18.09      | 20.27      | 22.81      |
| <b>Iceland</b> |            |            |            |
| 2013           | 21.40      | 21.40      | 21.40      |
| 2030           | 21.40      | 22.73      | 24.13      |
| 2050           | 21.40      | 24.33      | 27.56      |
| <b>Ireland</b> |            |            |            |
| 2013           | 20.99      | 20.99      | 20.99      |
| 2030           | 20.99      | 22.05      | 23.18      |
| 2050           | 20.99      | 23.49      | 26.30      |
| <b>Italy</b>   |            |            |            |
| 2013           | 22.61      | 22.61      | 22.61      |
| 2030           | 22.61      | 23.77      | 24.99      |
| 2050           | 22.61      | 25.33      | 28.35      |

|                   | Scenario 1 | Scenario 2 | Scenario 3 |
|-------------------|------------|------------|------------|
| <b>Latvia</b>     |            |            |            |
| 2013              | 18.43      | 18.43      | 18.43      |
| 2030              | 18.43      | 19.33      | 20.30      |
| 2050              | 18.43      | 20.58      | 23.08      |
| <b>Lithuania</b>  |            |            |            |
| 2013              | 19.07      | 19.07      | 19.07      |
| 2030              | 19.07      | 19.89      | 20.77      |
| 2050              | 19.07      | 21.14      | 23.54      |
| <b>Luxembourg</b> |            |            |            |
| 2013              | 21.24      | 21.24      | 21.24      |
| 2030              | 21.24      | 22.30      | 23.41      |
| 2050              | 21.24      | 23.79      | 26.64      |
| <b>Macedonia</b>  |            |            |            |
| 2013              | 15.93      | 15.93      | 15.93      |
| 2030              | 15.93      | 17.05      | 18.29      |
| 2050              | 15.93      | 18.52      | 21.68      |
| <b>Malta</b>      |            |            |            |
| 2013              | 20.64      | 20.64      | 20.64      |
| 2030              | 20.64      | 21.64      | 22.70      |
| 2050              | 20.64      | 23.08      | 25.87      |
| <b>Moldova</b>    |            |            |            |
| 2013              | 15.57      | 15.57      | 15.57      |
| 2030              | 15.57      | 16.18      | 16.83      |
| 2050              | 15.57      | 17.30      | 19.32      |
| <b>Montenegro</b> |            |            |            |
| 2013              | 17.25      | 17.25      | 17.25      |
| 2030              | 17.25      | 18.64      | 20.19      |
| 2050              | 17.25      | 20.05      | 23.42      |
| <b>Netherland</b> |            |            |            |
| 2013              | 21.05      | 21.05      | 21.05      |
| 2030              | 21.05      | 22.13      | 23.27      |
| 2050              | 21.05      | 23.58      | 26.43      |
| <b>Norway</b>     |            |            |            |
| 2013              | 21.24      | 21.24      | 21.24      |
| 2030              | 21.24      | 22.44      | 23.71      |
| 2050              | 21.24      | 23.96      | 27.00      |
| <b>Poland</b>     |            |            |            |
| 2013              | 19.73      | 19.73      | 19.73      |
| 2030              | 19.73      | 20.66      | 21.64      |
| 2050              | 19.73      | 21.99      | 24.55      |

|                           | Scenario 1 | Scenario 2 | Scenario 3 |
|---------------------------|------------|------------|------------|
| <b>Portugal</b>           |            |            |            |
| 2013                      | 21.23      | 21.23      | 21.23      |
| 2030                      | 21.23      | 22.29      | 23.42      |
| 2050                      | 21.23      | 23.75      | 26.62      |
| <b>Romania</b>            |            |            |            |
| 2013                      | 17.71      | 17.71      | 17.71      |
| 2030                      | 17.71      | 18.80      | 20.00      |
| 2050                      | 17.71      | 20.11      | 22.96      |
| <b>Russian Federation</b> |            |            |            |
| 2013                      | 16.97      | 16.97      | 16.97      |
| 2030                      | 16.97      | 17.59      | 18.26      |
| 2050                      | 16.97      | 18.54      | 20.39      |
| <b>Serbia</b>             |            |            |            |
| 2013                      | 16.49      | 16.49      | 16.49      |
| 2030                      | 16.49      | 17.39      | 18.36      |
| 2050                      | 16.49      | 18.67      | 21.24      |
| <b>Slovakia</b>           |            |            |            |
| 2013                      | 18.44      | 18.44      | 18.44      |
| 2030                      | 18.44      | 19.49      | 20.62      |
| 2050                      | 18.44      | 20.85      | 23.65      |
| <b>Slovenia</b>           |            |            |            |
| 2013                      | 20.86      | 20.86      | 20.86      |
| 2030                      | 20.86      | 21.83      | 22.85      |
| 2050                      | 20.86      | 23.28      | 25.98      |
| <b>Spain</b>              |            |            |            |
| 2013                      | 22.64      | 22.64      | 22.64      |
| 2030                      | 22.64      | 23.62      | 24.66      |
| 2050                      | 22.64      | 25.15      | 27.97      |
| <b>Sweden</b>             |            |            |            |
| 2013                      | 21.22      | 21.22      | 21.22      |
| 2030                      | 21.22      | 22.33      | 23.50      |
| 2050                      | 21.22      | 23.83      | 26.72      |
| <b>Switzerland</b>        |            |            |            |
| 2013                      | 22.42      | 22.42      | 22.42      |
| 2030                      | 22.42      | 23.82      | 25.31      |
| 2050                      | 22.42      | 25.37      | 28.71      |
| <b>UK</b>                 |            |            |            |
| 2013                      | 21.22      | 21.22      | 21.22      |
| 2030                      | 21.22      | 22.34      | 23.52      |
| 2050                      | 21.22      | 23.76      | 26.62      |

|                | <b>Scenario 1</b> | <b>Scenario 2</b> | <b>Scenario 3</b> |
|----------------|-------------------|-------------------|-------------------|
| <b>Ukraine</b> |                   |                   |                   |
| 2013           | 16.65             | 16.65             | 16.65             |
| 2030           | 16.65             | 16.95             | 17.26             |
| 2050           | 16.65             | 17.96             | 19.44             |

Note: Scenarios are based on the assumptions concerning life expectancies at birth discussed in the text.
