# Supplementary material for: Faster Increases in Human Life Expectancy Could Lead to Slower Population Aging
Source: PubMed Central journal article supplement (PMC4398478; doi:10.1371/journal.pone.0121922), 2015-04-15
Supplement: pone.0121922.s002.pdf [file pone.0121922.s002.pdf]

# Supporting Information

S2 Table. Proportions Old (both sexes combined).

|                   | Proportion 65+ |            |            | Proportion With Remaining Life Expectancy 15 Years or Less |            |            |
|-------------------|----------------|------------|------------|------------------------------------------------------------|------------|------------|
|                   | Scenario 1     | Scenario 2 | Scenario 3 | Scenario 1                                                 | Scenario 2 | Scenario 3 |
| <b>Albania</b>    |                |            |            |                                                            |            |            |
| 2013              | 0.118          | 0.118      | 0.118      | 0.099                                                      | 0.099      | 0.099      |
| 2030              | 0.189          | 0.193      | 0.198      | 0.154                                                      | 0.145      | 0.135      |
| 2050              | 0.222          | 0.242      | 0.263      | 0.190                                                      | 0.179      | 0.170      |
| <b>Austria</b>    |                |            |            |                                                            |            |            |
| 2013              | 0.181          | 0.181      | 0.181      | 0.119                                                      | 0.119      | 0.119      |
| 2030              | 0.236          | 0.243      | 0.250      | 0.152                                                      | 0.141      | 0.131      |
| 2050              | 0.263          | 0.290      | 0.317      | 0.189                                                      | 0.183      | 0.174      |
| <b>Belarus</b>    |                |            |            |                                                            |            |            |
| 2013              | 0.138          | 0.138      | 0.138      | 0.148                                                      | 0.148      | 0.148      |
| 2030              | 0.197          | 0.201      | 0.205      | 0.198                                                      | 0.185      | 0.174      |
| 2050              | 0.224          | 0.244      | 0.267      | 0.231                                                      | 0.209      | 0.190      |
| <b>Belgium</b>    |                |            |            |                                                            |            |            |
| 2013              | 0.176          | 0.176      | 0.176      | 0.121                                                      | 0.121      | 0.121      |
| 2030              | 0.216          | 0.222      | 0.228      | 0.146                                                      | 0.137      | 0.128      |
| 2050              | 0.220          | 0.241      | 0.263      | 0.158                                                      | 0.152      | 0.145      |
| <b>Bulgaria</b>   |                |            |            |                                                            |            |            |
| 2013              | 0.192          | 0.192      | 0.192      | 0.182                                                      | 0.182      | 0.182      |
| 2030              | 0.227          | 0.231      | 0.235      | 0.218                                                      | 0.209      | 0.201      |
| 2050              | 0.260          | 0.281      | 0.304      | 0.250                                                      | 0.235      | 0.220      |
| <b>Croatia</b>    |                |            |            |                                                            |            |            |
| 2013              | 0.181          | 0.181      | 0.181      | 0.158                                                      | 0.158      | 0.158      |
| 2030              | 0.228          | 0.234      | 0.241      | 0.197                                                      | 0.187      | 0.176      |
| 2050              | 0.245          | 0.269      | 0.295      | 0.212                                                      | 0.198      | 0.185      |
| <b>Cyprus</b>     |                |            |            |                                                            |            |            |
| 2013              | 0.132          | 0.132      | 0.132      | 0.087                                                      | 0.087      | 0.087      |
| 2030              | 0.169          | 0.172      | 0.175      | 0.115                                                      | 0.109      | 0.104      |
| 2050              | 0.197          | 0.211      | 0.226      | 0.133                                                      | 0.123      | 0.113      |
| <b>Czech Rep.</b> |                |            |            |                                                            |            |            |
| 2013              | 0.168          | 0.168      | 0.168      | 0.126                                                      | 0.126      | 0.126      |
| 2030              | 0.210          | 0.217      | 0.223      | 0.173                                                      | 0.164      | 0.155      |
| 2050              | 0.239          | 0.264      | 0.290      | 0.197                                                      | 0.180      | 0.159      |

|                | Proportion 65+ |            |            | Proportion With Remaining Life Expectancy 15 Years or Less |            |            |
|----------------|----------------|------------|------------|------------------------------------------------------------|------------|------------|
|                | Scenario 1     | Scenario 2 | Scenario 3 | Scenario 1                                                 | Scenario 2 | Scenario 3 |
| <b>Denmark</b> |                |            |            |                                                            |            |            |
| 2013           | 0.178          | 0.178      | 0.178      | 0.117                                                      | 0.117      | 0.117      |
| 2030           | 0.212          | 0.215      | 0.219      | 0.154                                                      | 0.147      | 0.140      |
| 2050           | 0.199          | 0.215      | 0.233      | 0.153                                                      | 0.148      | 0.140      |
| <b>Estonia</b> |                |            |            |                                                            |            |            |
| 2013           | 0.180          | 0.180      | 0.180      | 0.147                                                      | 0.147      | 0.147      |
| 2030           | 0.222          | 0.224      | 0.225      | 0.181                                                      | 0.176      | 0.170      |
| 2050           | 0.244          | 0.258      | 0.273      | 0.202                                                      | 0.189      | 0.177      |
| <b>Finland</b> |                |            |            |                                                            |            |            |
| 2013           | 0.188          | 0.188      | 0.188      | 0.117                                                      | 0.117      | 0.117      |
| 2030           | 0.238          | 0.244      | 0.250      | 0.167                                                      | 0.159      | 0.151      |
| 2050           | 0.217          | 0.237      | 0.258      | 0.152                                                      | 0.146      | 0.141      |
| <b>France</b>  |                |            |            |                                                            |            |            |
| 2013           | 0.175          | 0.175      | 0.175      | 0.103                                                      | 0.103      | 0.103      |
| 2030           | 0.228          | 0.233      | 0.237      | 0.137                                                      | 0.129      | 0.122      |
| 2050           | 0.233          | 0.251      | 0.271      | 0.153                                                      | 0.147      | 0.139      |
| <b>Georgia</b> |                |            |            |                                                            |            |            |
| 2013           | 0.138          | 0.138      | 0.138      | 0.132                                                      | 0.132      | 0.132      |
| 2030           | 0.195          | 0.199      | 0.204      | 0.176                                                      | 0.166      | 0.155      |
| 2050           | 0.257          | 0.279      | 0.302      | 0.237                                                      | 0.218      | 0.199      |
| <b>Germany</b> |                |            |            |                                                            |            |            |
| 2013           | 0.207          | 0.207      | 0.207      | 0.148                                                      | 0.148      | 0.148      |
| 2030           | 0.267          | 0.273      | 0.279      | 0.177                                                      | 0.166      | 0.156      |
| 2050           | 0.278          | 0.303      | 0.329      | 0.205                                                      | 0.201      | 0.197      |
| <b>Greece</b>  |                |            |            |                                                            |            |            |
| 2013           | 0.201          | 0.201      | 0.201      | 0.144                                                      | 0.144      | 0.144      |
| 2030           | 0.234          | 0.240      | 0.247      | 0.164                                                      | 0.155      | 0.146      |
| 2050           | 0.280          | 0.304      | 0.330      | 0.205                                                      | 0.192      | 0.178      |
| <b>Hungary</b> |                |            |            |                                                            |            |            |
| 2013           | 0.172          | 0.172      | 0.172      | 0.153                                                      | 0.153      | 0.153      |
| 2030           | 0.208          | 0.213      | 0.219      | 0.191                                                      | 0.183      | 0.176      |
| 2050           | 0.239          | 0.261      | 0.283      | 0.219                                                      | 0.206      | 0.192      |
| <b>Iceland</b> |                |            |            |                                                            |            |            |
| 2013           | 0.129          | 0.129      | 0.129      | 0.076                                                      | 0.076      | 0.076      |
| 2030           | 0.181          | 0.185      | 0.189      | 0.111                                                      | 0.105      | 0.098      |
| 2050           | 0.191          | 0.206      | 0.223      | 0.124                                                      | 0.119      | 0.113      |
| <b>Ireland</b> |                |            |            |                                                            |            |            |
| 2013           | 0.122          | 0.122      | 0.122      | 0.079                                                      | 0.079      | 0.079      |
| 2030           | 0.169          | 0.172      | 0.176      | 0.113                                                      | 0.107      | 0.101      |
| 2050           | 0.211          | 0.226      | 0.242      | 0.147                                                      | 0.136      | 0.125      |

|                    | Proportion 65+ |            |            | Proportion With Remaining Life Expectancy 15 Years or Less |            |            |
|--------------------|----------------|------------|------------|------------------------------------------------------------|------------|------------|
|                    | Scenario 1     | Scenario 2 | Scenario 3 | Scenario 1                                                 | Scenario 2 | Scenario 3 |
| <b>Italy</b>       |                |            |            |                                                            |            |            |
| 2013               | 0.212          | 0.212      | 0.212      | 0.137                                                      | 0.137      | 0.137      |
| 2030               | 0.261          | 0.266      | 0.271      | 0.166                                                      | 0.158      | 0.150      |
| 2050               | 0.302          | 0.325      | 0.347      | 0.218                                                      | 0.206      | 0.192      |
| <b>Latvia</b>      |                |            |            |                                                            |            |            |
| 2013               | 0.188          | 0.188      | 0.188      | 0.173                                                      | 0.173      | 0.173      |
| 2030               | 0.226          | 0.231      | 0.237      | 0.203                                                      | 0.192      | 0.181      |
| 2050               | 0.252          | 0.275      | 0.300      | 0.232                                                      | 0.215      | 0.201      |
| <b>Lithuania</b>   |                |            |            |                                                            |            |            |
| 2013               | 0.182          | 0.182      | 0.182      | 0.160                                                      | 0.160      | 0.160      |
| 2030               | 0.228          | 0.232      | 0.236      | 0.193                                                      | 0.182      | 0.170      |
| 2050               | 0.244          | 0.265      | 0.288      | 0.217                                                      | 0.205      | 0.195      |
| <b>Luxembourg</b>  |                |            |            |                                                            |            |            |
| 2013               | 0.140          | 0.140      | 0.140      | 0.094                                                      | 0.094      | 0.094      |
| 2030               | 0.172          | 0.175      | 0.179      | 0.110                                                      | 0.103      | 0.097      |
| 2050               | 0.186          | 0.202      | 0.218      | 0.130                                                      | 0.124      | 0.118      |
| <b>Macedonia</b>   |                |            |            |                                                            |            |            |
| 2013               | 0.120          | 0.120      | 0.120      | 0.122                                                      | 0.122      | 0.122      |
| 2030               | 0.170          | 0.176      | 0.182      | 0.172                                                      | 0.162      | 0.152      |
| 2050               | 0.210          | 0.235      | 0.261      | 0.212                                                      | 0.194      | 0.178      |
| <b>Malta</b>       |                |            |            |                                                            |            |            |
| 2013               | 0.172          | 0.172      | 0.172      | 0.109                                                      | 0.109      | 0.109      |
| 2030               | 0.238          | 0.242      | 0.246      | 0.177                                                      | 0.168      | 0.160      |
| 2050               | 0.252          | 0.270      | 0.289      | 0.182                                                      | 0.168      | 0.157      |
| <b>Moldova</b>     |                |            |            |                                                            |            |            |
| 2013               | 0.099          | 0.099      | 0.099      | 0.115                                                      | 0.115      | 0.115      |
| 2030               | 0.180          | 0.183      | 0.186      | 0.196                                                      | 0.187      | 0.178      |
| 2050               | 0.256          | 0.275      | 0.296      | 0.290                                                      | 0.257      | 0.227      |
| <b>Montenegro</b>  |                |            |            |                                                            |            |            |
| 2013               | 0.132          | 0.132      | 0.132      | 0.119                                                      | 0.119      | 0.119      |
| 2030               | 0.182          | 0.188      | 0.195      | 0.164                                                      | 0.153      | 0.143      |
| 2050               | 0.200          | 0.223      | 0.249      | 0.180                                                      | 0.167      | 0.154      |
| <b>Netherlands</b> |                |            |            |                                                            |            |            |
| 2013               | 0.168          | 0.168      | 0.168      | 0.107                                                      | 0.107      | 0.107      |
| 2030               | 0.234          | 0.239      | 0.244      | 0.160                                                      | 0.152      | 0.143      |
| 2050               | 0.238          | 0.258      | 0.279      | 0.178                                                      | 0.173      | 0.167      |
| <b>Norway</b>      |                |            |            |                                                            |            |            |
| 2013               | 0.157          | 0.157      | 0.157      | 0.097                                                      | 0.097      | 0.097      |
| 2030               | 0.190          | 0.194      | 0.199      | 0.128                                                      | 0.121      | 0.115      |
| 2050               | 0.198          | 0.214      | 0.232      | 0.140                                                      | 0.133      | 0.125      |

|                           | Proportion 65+ |            |            | Proportion With Remaining Life Expectancy 15 Years or Less |            |            |
|---------------------------|----------------|------------|------------|------------------------------------------------------------|------------|------------|
|                           | Scenario 1     | Scenario 2 | Scenario 3 | Scenario 1                                                 | Scenario 2 | Scenario 3 |
| <b>Poland</b>             |                |            |            |                                                            |            |            |
| 2013                      | 0.142          | 0.142      | 0.142      | 0.112                                                      | 0.112      | 0.112      |
| 2030                      | 0.215          | 0.220      | 0.224      | 0.174                                                      | 0.165      | 0.156      |
| 2050                      | 0.259          | 0.279      | 0.300      | 0.203                                                      | 0.184      | 0.168      |
| <b>Portugal</b>           |                |            |            |                                                            |            |            |
| 2013                      | 0.194          | 0.194      | 0.194      | 0.136                                                      | 0.136      | 0.136      |
| 2030                      | 0.238          | 0.243      | 0.248      | 0.167                                                      | 0.159      | 0.150      |
| 2050                      | 0.261          | 0.281      | 0.303      | 0.195                                                      | 0.184      | 0.172      |
| <b>Romania</b>            |                |            |            |                                                            |            |            |
| 2013                      | 0.164          | 0.164      | 0.164      | 0.149                                                      | 0.149      | 0.149      |
| 2030                      | 0.210          | 0.216      | 0.222      | 0.193                                                      | 0.185      | 0.176      |
| 2050                      | 0.271          | 0.297      | 0.324      | 0.251                                                      | 0.236      | 0.218      |
| <b>Russian Federation</b> |                |            |            |                                                            |            |            |
| 2013                      | 0.129          | 0.129      | 0.129      | 0.138                                                      | 0.138      | 0.138      |
| 2030                      | 0.184          | 0.187      | 0.190      | 0.187                                                      | 0.178      | 0.169      |
| 2050                      | 0.199          | 0.213      | 0.230      | 0.206                                                      | 0.189      | 0.172      |
| <b>Serbia</b>             |                |            |            |                                                            |            |            |
| 2013                      | 0.176          | 0.176      | 0.176      | 0.173                                                      | 0.173      | 0.173      |
| 2030                      | 0.217          | 0.223      | 0.229      | 0.212                                                      | 0.204      | 0.195      |
| 2050                      | 0.218          | 0.240      | 0.263      | 0.213                                                      | 0.199      | 0.185      |
| <b>Slovakia</b>           |                |            |            |                                                            |            |            |
| 2013                      | 0.131          | 0.131      | 0.131      | 0.113                                                      | 0.113      | 0.113      |
| 2030                      | 0.195          | 0.200      | 0.206      | 0.172                                                      | 0.162      | 0.153      |
| 2050                      | 0.240          | 0.262      | 0.286      | 0.212                                                      | 0.194      | 0.176      |
| <b>Slovenia</b>           |                |            |            |                                                            |            |            |
| 2013                      | 0.171          | 0.171      | 0.171      | 0.123                                                      | 0.123      | 0.123      |
| 2030                      | 0.239          | 0.243      | 0.246      | 0.174                                                      | 0.165      | 0.157      |
| 2050                      | 0.271          | 0.290      | 0.310      | 0.203                                                      | 0.190      | 0.178      |
| <b>Spain</b>              |                |            |            |                                                            |            |            |
| 2013                      | 0.177          | 0.177      | 0.177      | 0.114                                                      | 0.114      | 0.114      |
| 2030                      | 0.230          | 0.234      | 0.238      | 0.142                                                      | 0.135      | 0.127      |
| 2050                      | 0.300          | 0.320      | 0.340      | 0.207                                                      | 0.192      | 0.175      |
| <b>Sweden</b>             |                |            |            |                                                            |            |            |
| 2013                      | 0.191          | 0.191      | 0.191      | 0.119                                                      | 0.119      | 0.119      |
| 2030                      | 0.209          | 0.214      | 0.218      | 0.145                                                      | 0.139      | 0.133      |
| 2050                      | 0.200          | 0.217      | 0.234      | 0.142                                                      | 0.135      | 0.128      |
| <b>Switzerland</b>        |                |            |            |                                                            |            |            |
| 2013                      | 0.174          | 0.174      | 0.174      | 0.102                                                      | 0.102      | 0.102      |
| 2030                      | 0.233          | 0.239      | 0.245      | 0.140                                                      | 0.131      | 0.122      |
| 2050                      | 0.260          | 0.282      | 0.305      | 0.175                                                      | 0.168      | 0.159      |

|                | Proportion 65+ |            |            | Proportion With Remaining Life Expectancy 15 Years or Less |            |            |
|----------------|----------------|------------|------------|------------------------------------------------------------|------------|------------|
|                | Scenario 1     | Scenario 2 | Scenario 3 | Scenario 1                                                 | Scenario 2 | Scenario 3 |
| <b>UK</b>      |                |            |            |                                                            |            |            |
| 2013           | 0.172          | 0.172      | 0.172      | 0.109                                                      | 0.109      | 0.109      |
| 2030           | 0.206          | 0.211      | 0.215      | 0.136                                                      | 0.129      | 0.122      |
| 2050           | 0.215          | 0.232      | 0.249      | 0.150                                                      | 0.143      | 0.137      |
| <b>Ukraine</b> |                |            |            |                                                            |            |            |
| 2013           | 0.152          | 0.152      | 0.152      | 0.162                                                      | 0.162      | 0.162      |
| 2030           | 0.190          | 0.192      | 0.193      | 0.196                                                      | 0.192      | 0.187      |
| 2050           | 0.214          | 0.226      | 0.238      | 0.225                                                      | 0.209      | 0.192      |

Note: Scenarios are based on the assumptions concerning life expectancies at birth discussed in the text.
