# Supplementary material for: Faster Increases in Human Life Expectancy Could Lead to Slower Population Aging
Source: PubMed Central journal article supplement (PMC4398478; doi:10.1371/journal.pone.0121922), 2015-04-15
Supplement: pone.0121922.s003.pdf [file pone.0121922.s003.pdf]

# Supporting Information

S3 Table. Median Age and Prospective Median Age, 3 scenarios (females).

|                   | Median Age |            |            | Prospective Median Age |            |            |
|-------------------|------------|------------|------------|------------------------|------------|------------|
|                   | Scenario 1 | Scenario 2 | Scenario 3 | Scenario 1             | Scenario 2 | Scenario 3 |
| <b>Albania</b>    |            |            |            |                        |            |            |
| 2013              | 35.63      | 35.63      | 35.63      | 35.63                  | 35.63      | 35.63      |
| 2030              | 42.09      | 42.33      | 42.57      | 42.09                  | 40.99      | 39.84      |
| 2050              | 50.68      | 51.59      | 52.55      | 50.68                  | 48.75      | 46.59      |
| <b>Austria</b>    |            |            |            |                        |            |            |
| 2013              | 43.80      | 43.80      | 43.80      | 43.80                  | 43.80      | 43.80      |
| 2030              | 47.07      | 47.45      | 47.83      | 47.07                  | 45.62      | 44.12      |
| 2050              | 48.51      | 50.26      | 52.07      | 48.51                  | 46.29      | 44.00      |
| <b>Belarus</b>    |            |            |            |                        |            |            |
| 2013              | 42.32      | 42.32      | 42.32      | 42.32                  | 42.32      | 42.32      |
| 2030              | 46.53      | 46.72      | 46.91      | 46.53                  | 45.45      | 44.36      |
| 2050              | 48.44      | 50.05      | 51.77      | 48.44                  | 47.01      | 45.57      |
| <b>Belgium</b>    |            |            |            |                        |            |            |
| 2013              | 42.22      | 42.22      | 42.22      | 42.22                  | 42.22      | 42.22      |
| 2030              | 43.40      | 43.78      | 44.17      | 43.40                  | 41.88      | 40.35      |
| 2050              | 43.21      | 44.53      | 45.97      | 43.21                  | 40.72      | 38.25      |
| <b>Bulgaria</b>   |            |            |            |                        |            |            |
| 2013              | 44.96      | 44.96      | 44.96      | 44.96                  | 44.96      | 44.96      |
| 2030              | 48.91      | 49.18      | 49.45      | 48.91                  | 47.98      | 47.03      |
| 2050              | 49.69      | 51.26      | 53.16      | 49.69                  | 48.28      | 47.09      |
| <b>Croatia</b>    |            |            |            |                        |            |            |
| 2013              | 44.52      | 44.52      | 44.52      | 44.52                  | 44.52      | 44.52      |
| 2030              | 47.18      | 47.57      | 47.96      | 47.18                  | 45.95      | 44.71      |
| 2050              | 48.40      | 50.05      | 51.70      | 48.40                  | 46.58      | 44.68      |
| <b>Cyprus</b>     |            |            |            |                        |            |            |
| 2013              | 37.10      | 37.10      | 37.10      | 37.10                  | 37.10      | 37.10      |
| 2030              | 41.85      | 42.00      | 42.14      | 41.85                  | 40.71      | 39.54      |
| 2050              | 44.20      | 45.22      | 46.27      | 44.20                  | 42.03      | 39.77      |
| <b>Czech Rep.</b> |            |            |            |                        |            |            |
| 2013              | 41.93      | 41.93      | 41.93      | 41.93                  | 41.93      | 41.93      |
| 2030              | 46.88      | 47.29      | 47.70      | 46.88                  | 45.42      | 43.92      |
| 2050              | 45.57      | 47.36      | 49.28      | 45.57                  | 43.32      | 41.12      |
| <b>Denmark</b>    |            |            |            |                        |            |            |
| 2013              | 41.90      | 41.90      | 41.90      | 41.90                  | 41.90      | 41.90      |
| 2030              | 42.09      | 42.39      | 42.68      | 42.09                  | 40.94      | 39.77      |
| 2050              | 41.48      | 42.55      | 43.66      | 41.48                  | 39.21      | 36.91      |

|                | Median Age |            |            | Prospective Median Age |            |            |
|----------------|------------|------------|------------|------------------------|------------|------------|
|                | Scenario 1 | Scenario 2 | Scenario 3 | Scenario 1             | Scenario 2 | Scenario 3 |
| <b>Estonia</b> |            |            |            |                        |            |            |
| 2013           | 44.29      | 44.29      | 44.29      | 44.29                  | 44.29      | 44.29      |
| 2030           | 47.26      | 47.33      | 47.40      | 47.26                  | 46.73      | 46.19      |
| 2050           | 47.32      | 48.33      | 49.41      | 47.32                  | 46.00      | 44.63      |
| <b>Finland</b> |            |            |            |                        |            |            |
| 2013           | 44.04      | 44.04      | 44.04      | 44.04                  | 44.04      | 44.04      |
| 2030           | 44.29      | 44.68      | 45.06      | 44.29                  | 43.01      | 41.69      |
| 2050           | 42.51      | 43.81      | 45.23      | 42.51                  | 40.22      | 37.96      |
| <b>France</b>  |            |            |            |                        |            |            |
| 2013           | 41.83      | 41.83      | 41.83      | 41.83                  | 41.83      | 41.83      |
| 2030           | 43.85      | 44.13      | 44.42      | 43.85                  | 42.59      | 41.33      |
| 2050           | 43.63      | 44.78      | 46.01      | 43.63                  | 41.33      | 39.05      |
| <b>Georgia</b> |            |            |            |                        |            |            |
| 2013           | 39.69      | 39.69      | 39.69      | 39.69                  | 39.69      | 39.69      |
| 2030           | 45.99      | 46.17      | 46.35      | 45.99                  | 45.03      | 44.04      |
| 2050           | 51.78      | 53.43      | 54.99      | 51.78                  | 50.61      | 49.21      |
| <b>Germany</b> |            |            |            |                        |            |            |
| 2013           | 46.46      | 46.46      | 46.46      | 46.46                  | 46.46      | 46.46      |
| 2030           | 49.07      | 49.46      | 49.85      | 49.07                  | 47.85      | 46.61      |
| 2050           | 49.28      | 50.91      | 52.63      | 49.28                  | 47.42      | 45.55      |
| <b>Greece</b>  |            |            |            |                        |            |            |
| 2013           | 43.80      | 43.80      | 43.80      | 43.80                  | 43.80      | 43.80      |
| 2030           | 48.58      | 48.96      | 49.33      | 48.58                  | 47.19      | 45.75      |
| 2050           | 48.34      | 50.07      | 51.93      | 48.34                  | 46.41      | 44.49      |
| <b>Hungary</b> |            |            |            |                        |            |            |
| 2013           | 43.47      | 43.47      | 43.47      | 43.47                  | 43.47      | 43.47      |
| 2030           | 47.76      | 48.12      | 48.46      | 47.76                  | 46.60      | 45.41      |
| 2050           | 48.46      | 49.93      | 51.50      | 48.46                  | 46.56      | 44.69      |
| <b>Iceland</b> |            |            |            |                        |            |            |
| 2013           | 36.19      | 36.19      | 36.19      | 36.19                  | 36.19      | 36.19      |
| 2030           | 38.53      | 38.77      | 39.00      | 38.53                  | 37.09      | 35.58      |
| 2050           | 39.87      | 40.81      | 41.81      | 39.87                  | 37.20      | 34.43      |
| <b>Ireland</b> |            |            |            |                        |            |            |
| 2013           | 35.90      | 35.90      | 35.90      | 35.90                  | 35.90      | 35.90      |
| 2030           | 40.57      | 40.83      | 41.07      | 40.57                  | 39.37      | 38.14      |
| 2050           | 40.75      | 41.59      | 42.46      | 40.75                  | 38.27      | 35.74      |
| <b>Italy</b>   |            |            |            |                        |            |            |
| 2013           | 45.71      | 45.71      | 45.71      | 45.71                  | 45.71      | 45.71      |
| 2030           | 51.08      | 51.38      | 51.69      | 51.08                  | 49.94      | 48.77      |
| 2050           | 50.54      | 52.16      | 53.86      | 50.54                  | 48.84      | 47.12      |

|                    | Median Age |            |            | Prospective Median Age |            |            |
|--------------------|------------|------------|------------|------------------------|------------|------------|
|                    | Scenario 1 | Scenario 2 | Scenario 3 | Scenario 1             | Scenario 2 | Scenario 3 |
| <b>Latvia</b>      |            |            |            |                        |            |            |
| 2013               | 45.68      | 45.68      | 45.68      | 45.68                  | 45.68      | 45.68      |
| 2030               | 48.54      | 48.89      | 49.24      | 48.54                  | 47.48      | 46.40      |
| 2050               | 50.88      | 52.87      | 54.85      | 50.88                  | 49.75      | 48.47      |
| <b>Lithuania</b>   |            |            |            |                        |            |            |
| 2013               | 45.15      | 45.15      | 45.15      | 45.15                  | 45.15      | 45.15      |
| 2030               | 48.11      | 48.41      | 48.72      | 48.11                  | 47.09      | 46.06      |
| 2050               | 50.64      | 52.18      | 53.73      | 50.64                  | 49.07      | 47.40      |
| <b>Luxembourg</b>  |            |            |            |                        |            |            |
| 2013               | 39.68      | 39.68      | 39.68      | 39.68                  | 39.68      | 39.68      |
| 2030               | 40.30      | 40.49      | 40.67      | 40.30                  | 39.04      | 37.79      |
| 2050               | 40.47      | 41.31      | 42.17      | 40.47                  | 37.97      | 35.40      |
| <b>Macedonia</b>   |            |            |            |                        |            |            |
| 2013               | 37.67      | 37.67      | 37.67      | 37.67                  | 37.67      | 37.67      |
| 2030               | 42.89      | 43.20      | 43.52      | 42.89                  | 41.51      | 40.07      |
| 2050               | 46.25      | 47.91      | 49.58      | 46.25                  | 44.15      | 41.91      |
| <b>Malta</b>       |            |            |            |                        |            |            |
| 2013               | 41.96      | 41.96      | 41.96      | 41.96                  | 41.96      | 41.96      |
| 2030               | 45.79      | 46.05      | 46.30      | 45.79                  | 44.74      | 43.63      |
| 2050               | 48.17      | 49.46      | 50.79      | 48.17                  | 46.34      | 44.41      |
| <b>Moldova</b>     |            |            |            |                        |            |            |
| 2013               | 36.78      | 36.78      | 36.78      | 36.78                  | 36.78      | 36.78      |
| 2030               | 45.71      | 45.83      | 45.95      | 45.71                  | 44.80      | 43.84      |
| 2050               | 55.62      | 56.66      | 57.65      | 55.62                  | 53.99      | 52.17      |
| <b>Montenegro</b>  |            |            |            |                        |            |            |
| 2013               | 38.50      | 38.50      | 38.50      | 38.50                  | 38.50      | 38.50      |
| 2030               | 42.06      | 42.49      | 42.92      | 42.06                  | 40.40      | 38.66      |
| 2050               | 43.95      | 45.56      | 47.18      | 43.95                  | 41.48      | 38.91      |
| <b>Netherlands</b> |            |            |            |                        |            |            |
| 2013               | 42.39      | 42.39      | 42.39      | 42.39                  | 42.39      | 42.39      |
| 2030               | 44.90      | 45.22      | 45.55      | 44.90                  | 43.72      | 42.53      |
| 2050               | 44.98      | 46.28      | 47.62      | 44.98                  | 42.87      | 40.72      |
| <b>Norway</b>      |            |            |            |                        |            |            |
| 2013               | 39.68      | 39.68      | 39.68      | 39.68                  | 39.68      | 39.68      |
| 2030               | 40.52      | 40.78      | 41.04      | 40.52                  | 39.19      | 37.83      |
| 2050               | 40.69      | 41.72      | 42.79      | 40.69                  | 38.19      | 35.63      |
| <b>Poland</b>      |            |            |            |                        |            |            |
| 2013               | 40.53      | 40.53      | 40.53      | 40.53                  | 40.53      | 40.53      |
| 2030               | 46.63      | 46.83      | 47.03      | 46.63                  | 45.47      | 44.29      |
| 2050               | 49.84      | 51.34      | 52.86      | 49.84                  | 48.15      | 46.42      |

|                           | Median Age |            |            | Prospective Median Age |            |            |
|---------------------------|------------|------------|------------|------------------------|------------|------------|
|                           | Scenario 1 | Scenario 2 | Scenario 3 | Scenario 1             | Scenario 2 | Scenario 3 |
| <b>Portugal</b>           |            |            |            |                        |            |            |
| 2013                      | 44.14      | 44.14      | 44.14      | 44.14                  | 44.14      | 44.14      |
| 2030                      | 48.91      | 49.18      | 49.46      | 48.91                  | 47.78      | 46.62      |
| 2050                      | 47.63      | 48.93      | 50.25      | 47.63                  | 45.68      | 43.62      |
| <b>Romania</b>            |            |            |            |                        |            |            |
| 2013                      | 42.70      | 42.70      | 42.70      | 42.70                  | 42.70      | 42.70      |
| 2030                      | 49.00      | 49.34      | 49.70      | 49.00                  | 47.70      | 46.36      |
| 2050                      | 51.18      | 52.96      | 54.92      | 51.18                  | 49.52      | 47.89      |
| <b>Russian Federation</b> |            |            |            |                        |            |            |
| 2013                      | 41.24      | 41.24      | 41.24      | 41.24                  | 41.24      | 41.24      |
| 2030                      | 44.93      | 45.08      | 45.24      | 44.93                  | 43.97      | 42.99      |
| 2050                      | 44.80      | 45.88      | 47.03      | 44.80                  | 43.18      | 41.52      |
| <b>Serbia</b>             |            |            |            |                        |            |            |
| 2013                      | 44.51      | 44.51      | 44.51      | 44.51                  | 44.51      | 44.51      |
| 2030                      | 46.48      | 46.80      | 47.13      | 46.48                  | 45.40      | 44.30      |
| 2050                      | 46.42      | 47.75      | 49.18      | 46.42                  | 44.50      | 42.56      |
| <b>Slovakia</b>           |            |            |            |                        |            |            |
| 2013                      | 39.74      | 39.74      | 39.74      | 39.74                  | 39.74      | 39.74      |
| 2030                      | 45.85      | 46.13      | 46.41      | 45.85                  | 44.59      | 43.30      |
| 2050                      | 48.01      | 49.68      | 51.35      | 48.01                  | 46.29      | 44.48      |
| <b>Slovenia</b>           |            |            |            |                        |            |            |
| 2013                      | 44.00      | 44.00      | 44.00      | 44.00                  | 44.00      | 44.00      |
| 2030                      | 48.25      | 48.49      | 48.73      | 48.25                  | 47.17      | 46.08      |
| 2050                      | 47.54      | 49.10      | 50.75      | 47.54                  | 45.92      | 44.30      |
| <b>Spain</b>              |            |            |            |                        |            |            |
| 2013                      | 42.43      | 42.43      | 42.43      | 42.43                  | 42.43      | 42.43      |
| 2030                      | 49.23      | 49.41      | 49.59      | 49.23                  | 48.13      | 47.03      |
| 2050                      | 49.24      | 50.59      | 52.05      | 49.24                  | 47.45      | 45.66      |
| <b>Sweden</b>             |            |            |            |                        |            |            |
| 2013                      | 41.91      | 41.91      | 41.91      | 41.91                  | 41.91      | 41.91      |
| 2030                      | 41.53      | 41.79      | 42.06      | 41.53                  | 40.33      | 39.10      |
| 2050                      | 40.47      | 41.46      | 42.49      | 40.47                  | 38.07      | 35.66      |
| <b>Switzerland</b>        |            |            |            |                        |            |            |
| 2013                      | 42.93      | 42.93      | 42.93      | 42.93                  | 42.93      | 42.93      |
| 2030                      | 46.27      | 46.62      | 46.98      | 46.27                  | 44.82      | 43.34      |
| 2050                      | 46.53      | 48.08      | 49.68      | 46.53                  | 44.38      | 42.15      |
| <b>UK</b>                 |            |            |            |                        |            |            |
| 2013                      | 40.85      | 40.85      | 40.85      | 40.85                  | 40.85      | 40.85      |
| 2030                      | 42.41      | 42.67      | 42.93      | 42.41                  | 41.12      | 39.83      |
| 2050                      | 41.73      | 42.84      | 44.01      | 41.73                  | 39.42      | 37.10      |

|                | Median Age |            |            | Prospective Median Age |            |            |
|----------------|------------|------------|------------|------------------------|------------|------------|
|                | Scenario 1 | Scenario 2 | Scenario 3 | Scenario 1             | Scenario 2 | Scenario 3 |
| <b>Ukraine</b> |            |            |            |                        |            |            |
| 2013           | 42.89      | 42.89      | 42.89      | 42.89                  | 42.89      | 42.89      |
| 2030           | 45.99      | 46.06      | 46.13      | 45.99                  | 45.56      | 45.11      |
| 2050           | 46.13      | 47.08      | 48.12      | 46.13                  | 44.94      | 43.76      |

Note: Scenarios are based on the assumptions concerning life expectancies at birth discussed in the text.
